# Supplementary material for: Hierarchical synthesis of silver monoliths and their efficient catalytic activity for the reduction of 4-nitrophenol to 4-aminophenol
Source: Royal Society of Chemistry journal article supplement (doi:10.1039/c5nj03710g), 2016-01-01
Supplement: c5nj03710g1.pdf [file c5nj03710g1.pdf]

## **Electronic Supplementary Information**

### **Hierarchical synthesis of silver monoliths and their efficient catalytic activity for the reduction of 4-Nitrophenol to 4-Aminophenol.**

Mustri Bano, Devendra Ahirwar, Molly Thomas, Gowhar Ahmad Naikoo, Mehraj Ud-Din Sheikh, and Farid Khan\*

*Nanomaterials Discovery Laboratory, Department of Chemistry, Dr. H. S. Gour Central University, Sagar – 470003, India*

\*[faridkhan58@yahoo.com](mailto:faridkhan58@yahoo.com); [farid.fk@rediffmail.com](mailto:farid.fk@rediffmail.com)

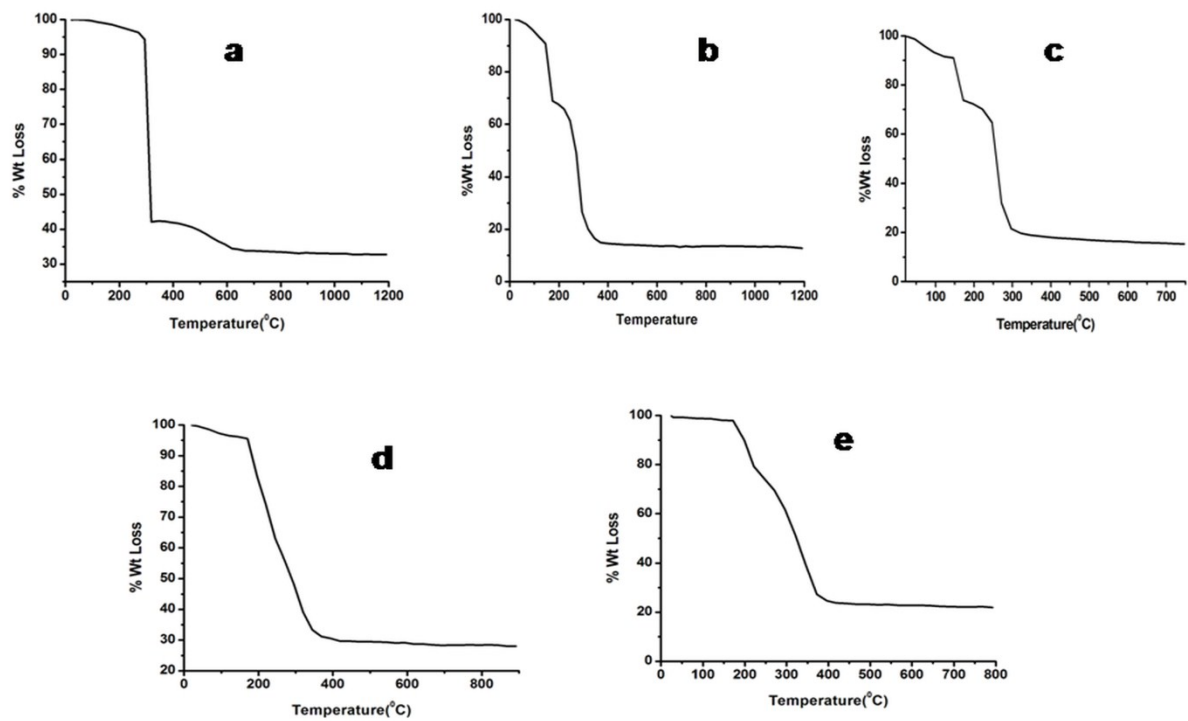

**Fig. S1.** TGA Graphs of Silver monoliths with Triton X-705 with and without additives. (a) Ag/Triton X-705 monolith, (b) Ag/Triton X-705/dextran monolith, (c) Ag/Triton X-705/SiNPs monolith, (d) Ag/Triton X-705/TMB monolith, (e) Ag/Triton X-705/Fe<sub>3</sub>O<sub>4</sub>NPs.

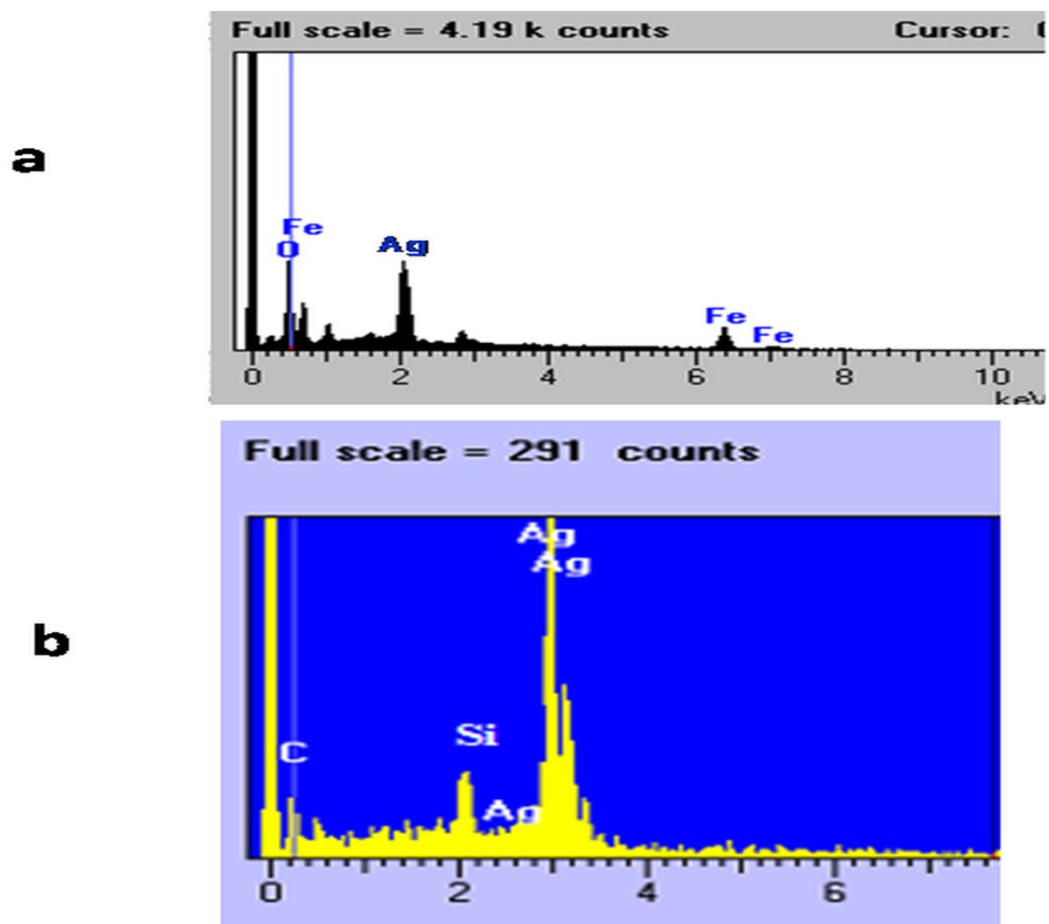

**Fig. S2.** Energy dispersive X-ray analysis of silica and  $\text{Fe}_3\text{O}_4$  nanoparticles in silver monoliths. (a) Iron nanoparticles in Ag/Triton X-705/ $\text{Fe}_3\text{O}_4$  nanoparticles monolith, (b) Silica nanoparticles in Ag/Triton X-705/silica nanoparticles monolith.

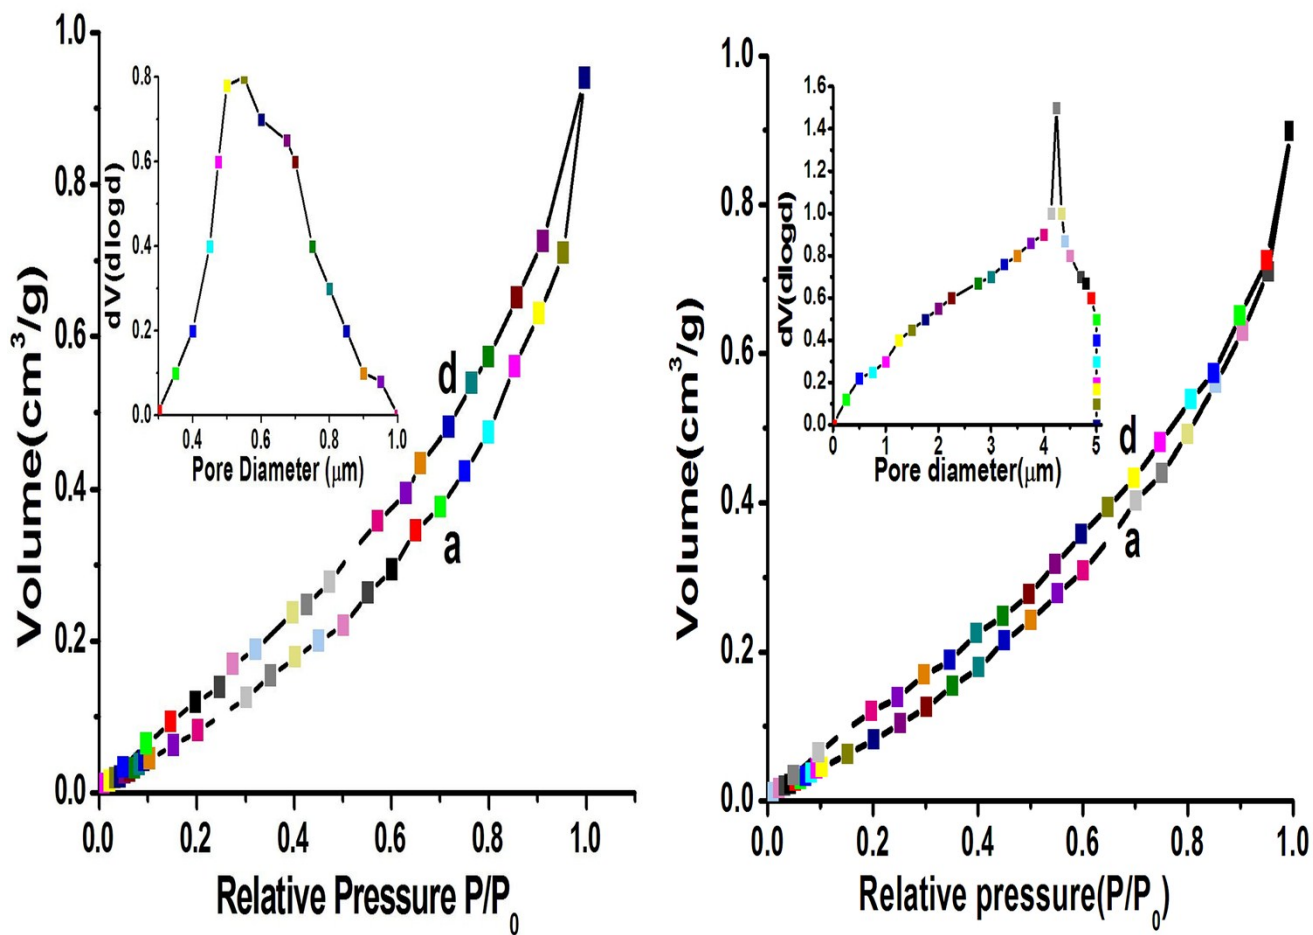

**Fig. S3.** N<sub>2</sub> Sorption & desorption curves of silver monoliths. (a) Ag/Triton X-705/SiNPs, (b) Ag/Triton X-705/Fe<sub>3</sub>O<sub>4</sub> NPs composites. The insets show the pore size distributions.

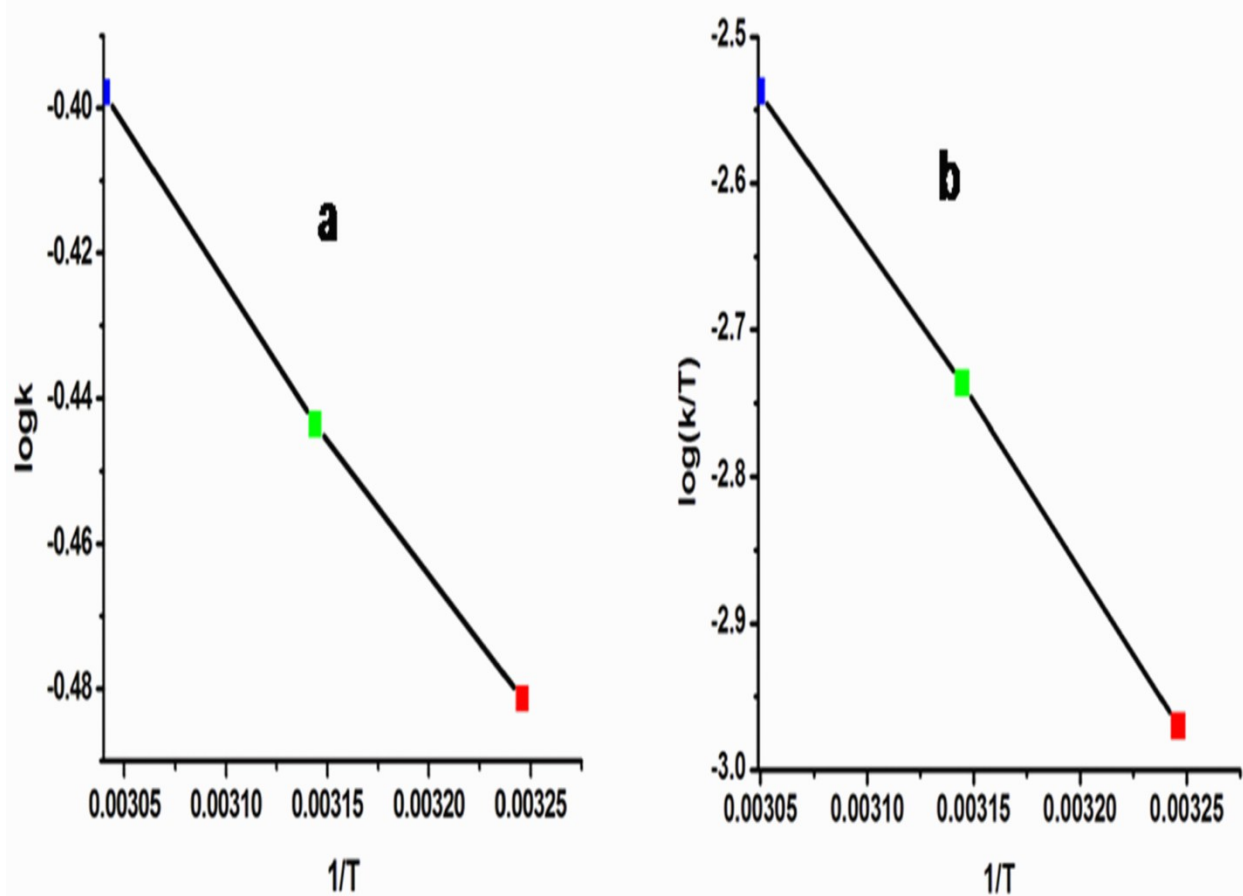

**Fig. S4.** Plots for activation Energy ( $E_a$ ), and thermodynamic parameters ( $\Delta H^\ddagger$ ), ( $\Delta S^\ddagger$ ) of catalyst Ag/Triton X-705/SiNPs for the reduction of 4-NP to 4-AP. (a) Plot between  $\log k$  Vs  $1/T$ , (b)  $\log k/T$  Vs  $1/T$ .

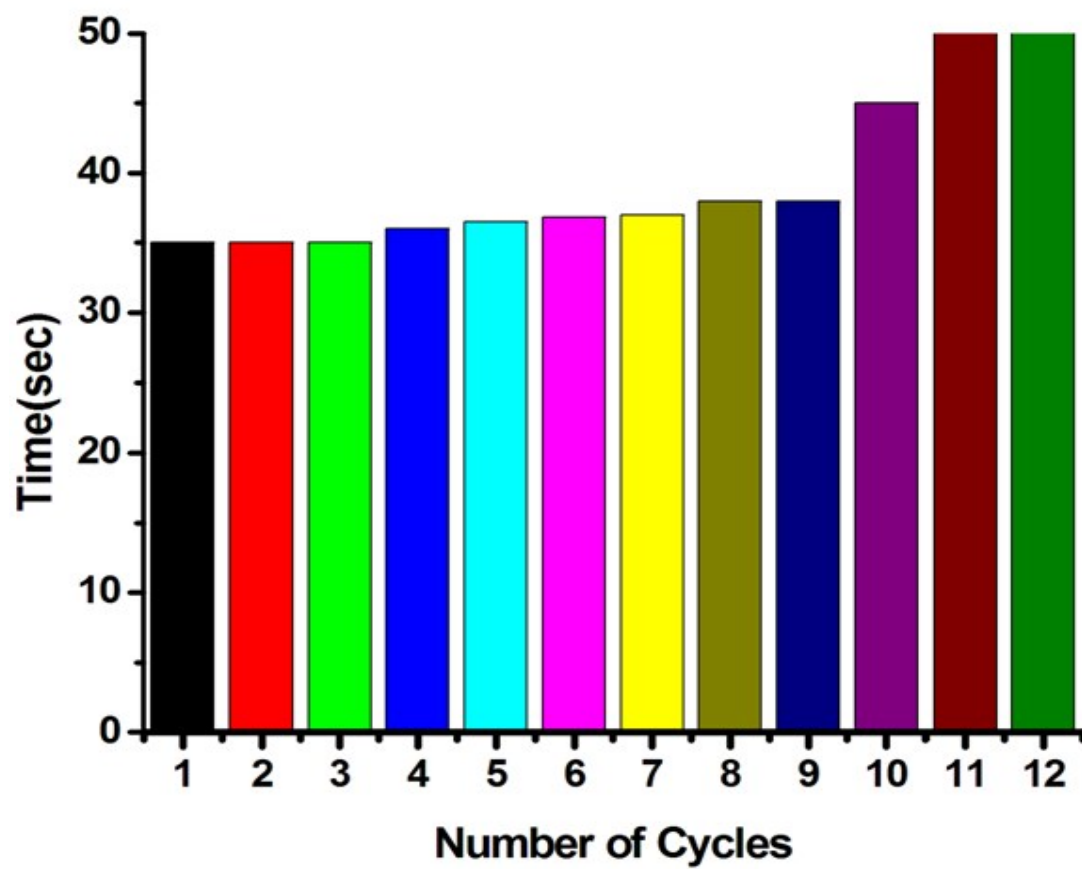

Fig. S5. Recyclability of Ag/Triton X-705/SiNPs composite.

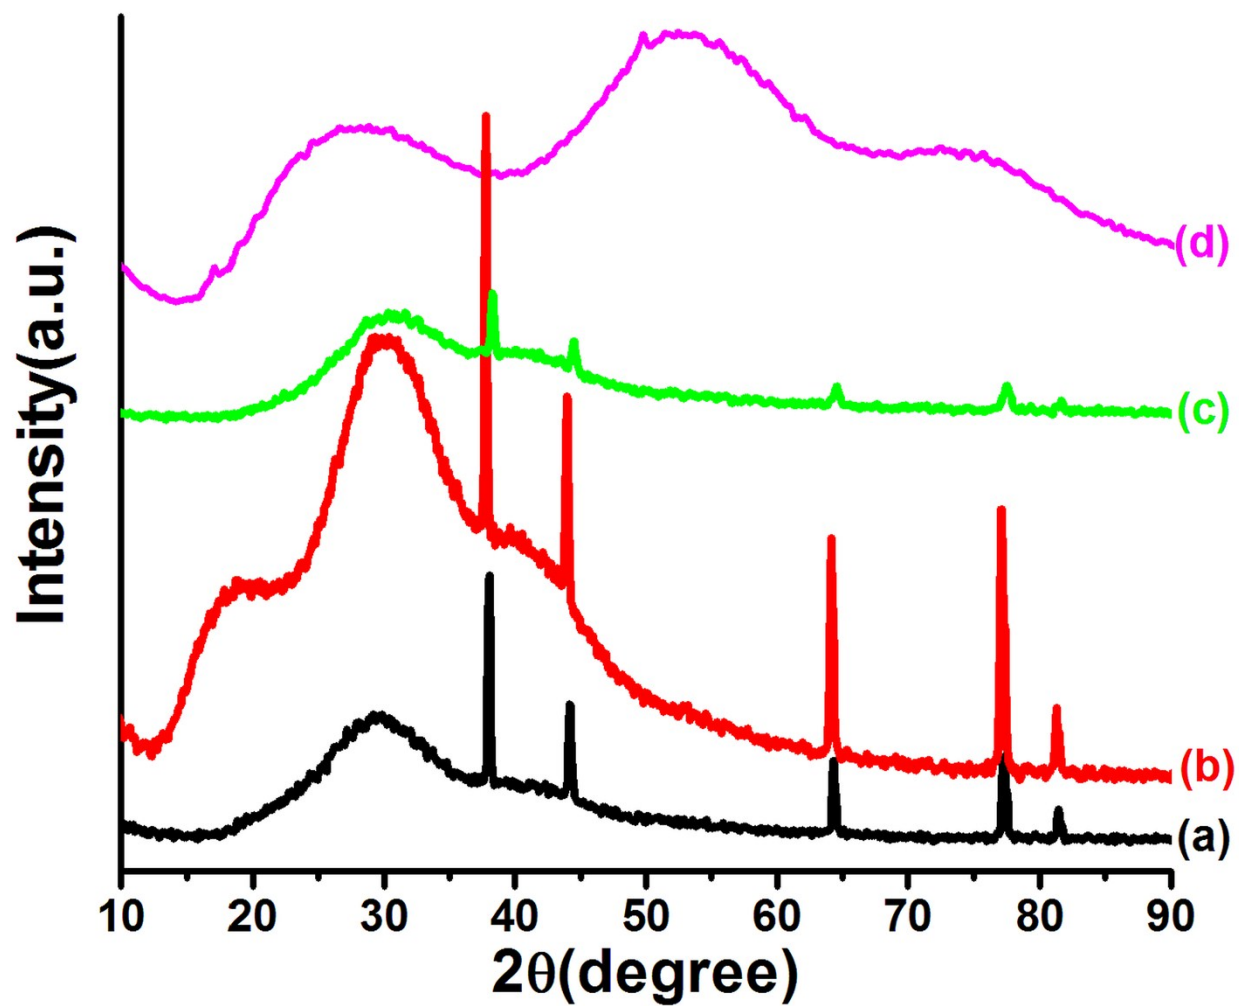

**Fig. S6.** XRD pattern of silver monoliths prepared using Triton X-705 gel template. (a) Ag/Triton X-705, (b) Ag/Triton X-705/dextran, (c) Ag/Triton X-705/TMB, (d) PMMA sample holder.

**Table S 1.** The Rate constants for the reduction of 4-NP at different temperatures & activation parameters by catalyst Ag/Triton X-705/silica NPs composite.

| <b>Compounds</b>     | <b>Temp (°C)</b> | <b>k(sec<sup>-1</sup>)</b> | <b>E<sub>a</sub> (kJmol<sup>-1</sup>)</b> | <b>ΔH<sup>‡</sup> (kJmol<sup>-1</sup>)</b> | <b>ΔS<sup>‡</sup> (J mol<sup>-1</sup>K<sup>-1</sup>)</b> | <b>ΔG<sup>‡</sup> kJmol<sup>-1</sup></b> | <b>Temperature coefficient</b> |
|----------------------|------------------|----------------------------|-------------------------------------------|--------------------------------------------|----------------------------------------------------------|------------------------------------------|--------------------------------|
| <b>4-nitrophenol</b> | 25               | 0.330                      |                                           |                                            |                                                          | 46.729                                   | 1.7666                         |
|                      | 35               | 0.583                      | 50.524                                    | 46.781                                     | -141.109                                                 | 48.139                                   |                                |
|                      | 45               | 0.952                      |                                           |                                            |                                                          | 49.551                                   | 1.6329                         |

Reaction conditions: 50μL of [4-NP] = [5.04 × 10<sup>-4</sup> moles/L], [0. 1M] NaBH<sub>4</sub>, 0.006 g catalyst.
